# Supplementary material for: Genetic and Phenotypic Features of a Novel Acinetobacter Species, Strain A47, Isolated From the Clinical Setting
Source: PubMed Central journal article supplement (PMC6591377; doi:10.3389/fmicb.2019.01375), 2019-06-18
Supplement: Image_2.pdf [file Image_2.pdf]

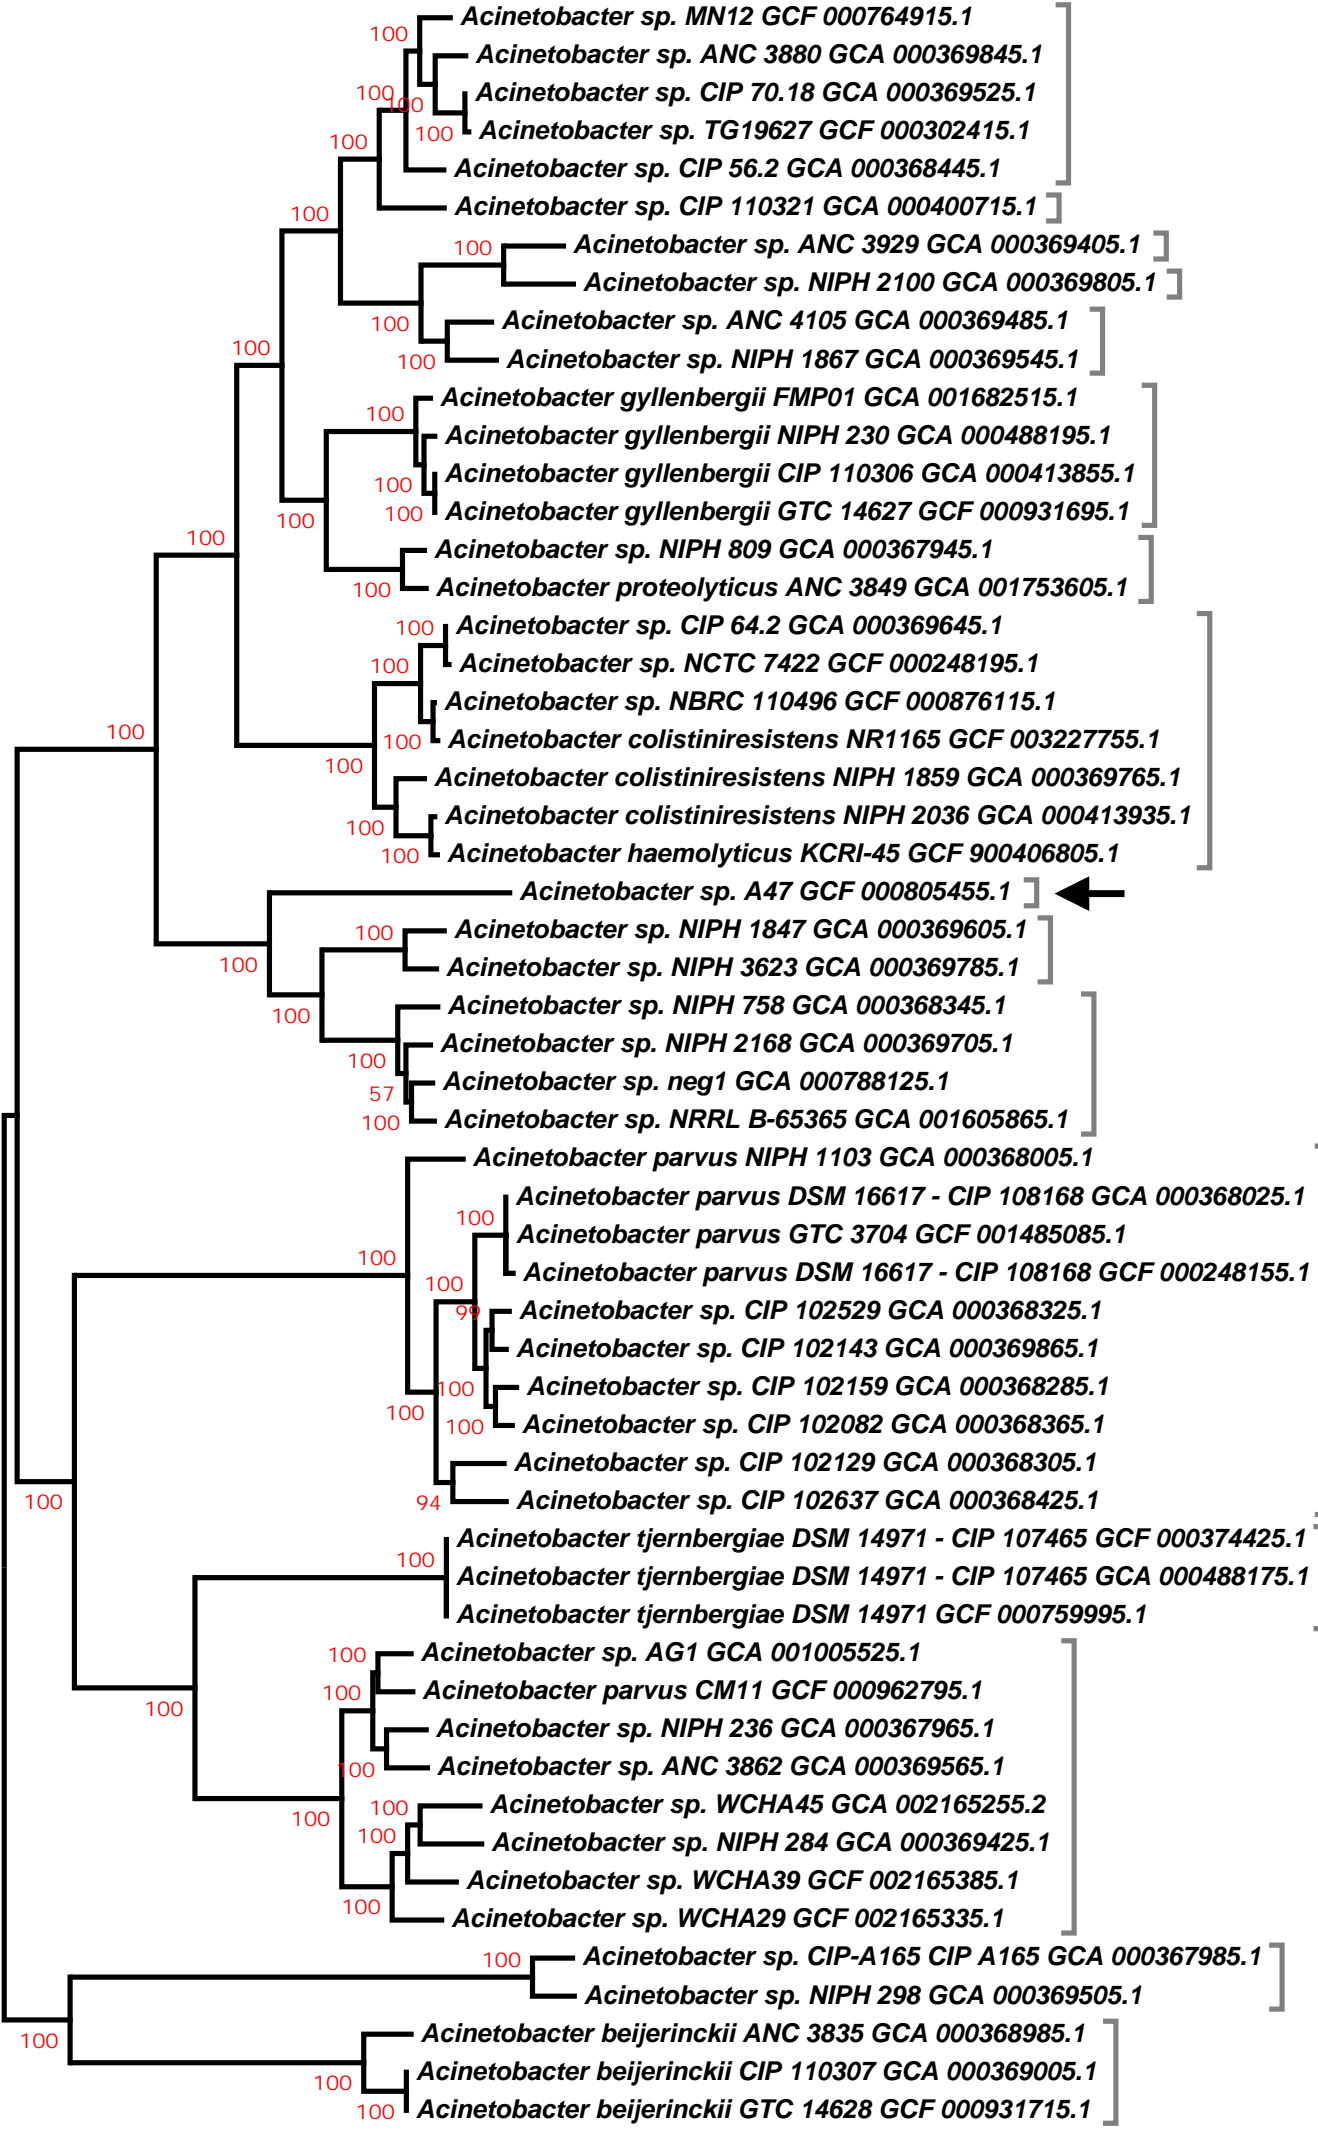

0.01
